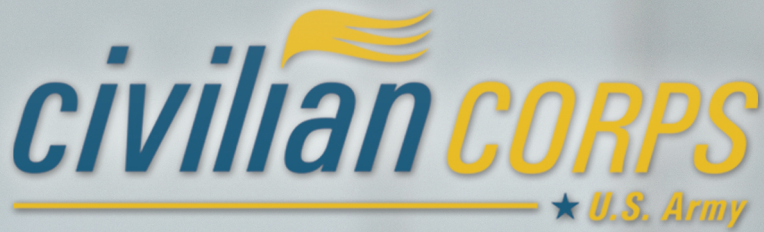

Dr. Roberta G., Psychiatrist

WORLD-CLASS HEALTH CARE

**FIRST-RATE BENEFITS**

Practice alongside other highly skilled civilian and military health care providers worldwide, and experience professional opportunities and benefits that can only be found in the Civilian Corps.

- Recruitment Bonuses
- Competitive Salary & Benefits
- Choice of Worldwide Locations
- Relocation Incentives
- Flexible Work Schedules
- Retention Incentives
- 60% of Army Hospital Employees are Civilians
- NO Military Requirements

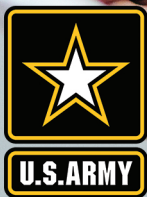

Army Medicine Civilian Corps employees are NOT subject to military requirements such as "boot camp," enlistments, or deployments.

Department of Defense is an equal opportunity employer.

FIND JOBS | POST YOUR CV | **APPLY TODAY**

**CivilianMedicalJobs.com/AJP**



# Subscribe today to the highest ranked mental health journal in the Health Policy & Services category!\*

## Don't miss the June issue:

- The psychiatric workforce crisis: analysis and commentary
- Integrating suicide safety plans into patient portals
- Viewpoint: work requirements in Medicaid
- Understanding pathways to care in first-episode psychosis

## Coming in the July issue:

- Improving outcomes for justice-involved people with serious mental illness
- Public willingness to pay to improve mental health services
- Benefits of adding cognitive remediation to supported employment
- Insurance and buprenorphine treatment retention for opioid use disorder

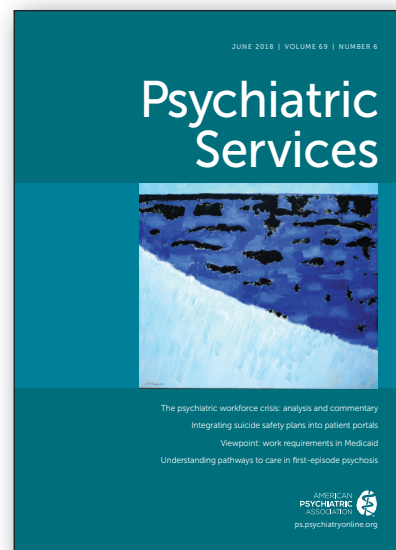

## One low price covers your print and online subscription.

\$ 121 APA Member print and online subscription

\$ 110 APA Member online-only subscription

PSYCHIATRIC  
SERVICES  
FROM PAGES  
TO PRACTICE

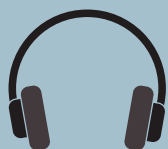

Listen to our podcast,  
*Psychiatric Services From Pages to Practice!*

[ps.psychiatryonline.org](http://ps.psychiatryonline.org)

Subscribe today at [www.appi.org](http://www.appi.org) or call  
Customer Service at 1-800-368-5777.

\*By its most recent Impact Factor (2.888), *Psychiatric Services* is the highest ranked mental health services journal in the Health Policy & Services Category of ISI's Journal Citation Reports. Of the 77 peer-reviewed journals included in the Health Policy & Services Category, *Psychiatric Services* ranks 8th.

AMERICAN  
PSYCHIATRIC  
ASSOCIATION  
PUBLISHING

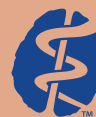

[www.appi.org](http://www.appi.org)

Priority Code AH1801JUNE

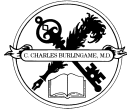

We are pleased to announce that  
**KENNETH S. KENDLER, M.D.**  
 is the 2018 recipient of the  
**C. CHARLES BURLINGAME, M.D. AWARD**  
 for his outstanding contributions to psychiatry.

**Past Recipients**

- 1988 Robert Kellner, M.D., Ph.D.
- 1989 William T. Carpenter, Jr., M.D.
- 1990 Dennis P. Cantwell, M.D.
- 1991 George E. Vaillant, M.D.
- 1992 A. John Rush, M.D.
- 1993 John C. Nemiah, M.D.
- 1994 Maurice J. Martin, M.D.
- 1995 Otto F. Kernberg, M.D.
- 1996 Charles P. O'Brien, M.D., Ph.D.
- 1997 Glen Owen Gabbard, M.D.
- 1998 Lissy F. Jarvik, M.D., Ph.D.
- 1999 Nancy C. Andreasen, M.D., Ph.D.
- 2000 Lewis L. Judd, M.D.
- 2001 Paul S. Appelbaum, M.D.
- 2002 Charles B. Nemeroff, M.D., Ph.D.
- 2003 Dilip V. Jeste, M.D.
- 2004 David H. Barlow, Ph.D.
- 2005 Herbert D. Kleber, M.D.
- 2006 Daniel N. Stern, M.D.
- 2007 Jerrold F. Rosenbaum, M.D.
- 2008 K. Ranga Rama Krishnan, M.D.
- 2009 David J. Kupfer, M.D.
- 2010 Professor Sir Michael Rutter
- 2011 Jeffrey A. Lieberman, M.D.
- 2012 Judith L. Rapoport, M.D.
- 2013 Nora D. Volkow, M.D.
- 2014 Daniel R. Weinberger, M.D.
- 2015 David A. Brent, M.D.
- 2016 Steven S. Sharfstein, M.D.
- 2017 Harold Alan Pincus, M.D.

**Institute of Living**  
 A Division of Hartford Hospital  
 200 Retreat Avenue  
 Hartford, CT 06106  
 1-800-673-2411

# Psychiatrists

## MINNESOTA

HealthPartners is one of the Upper Midwest's leading multispecialty physician groups. We have practice opportunities for talented, caring BC/BE psychiatrists in metropolitan Minneapolis/St. Paul and central Minnesota.

### Inpatient/Adult

- **Regions Hospital (St. Paul, MN)**  
 Our state-of-the-art inpatient psychiatric facilities allow our team of psychiatrists, residents, therapists, social workers, NPs/PAs and nursing staff to provide exceptional care to adult psychiatric inpatients. Our Regions care model schedule is 7 days on/7 days off.

### Outpatient/Adult

- **Central Minnesota (Sartell/St. Cloud)**
- **Metropolitan Minneapolis/St. Paul**

These teams provide integrated outpatient mental health services in our primary care and outpatient specialty clinics located within a variety of urban, suburban and semi-rural communities. Full-time or part-time practices are available. No hospital call responsibilities.

In addition to competitive salaries, HealthPartners offers an excellent benefits package, including an employer-matched 401(k) and 457(b), generous personal time off, malpractice insurance coverage, and more.

Let us tell you more! Please forward your CV and cover letter to:  
**lori.m.fake@healthpartners.com**, apply online at **healthpartners.com/careers**, or call 800-472-4695 x1. EOE

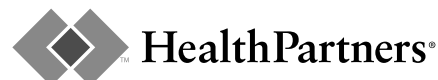

## The Art and Science of Brief Psychotherapies

### A Practitioner's Guide, Third Edition

Edited by Mantosh J. Dewan, M.D.,  
 Brett N. Steenbarger, Ph.D., and Roger P. Greenberg, Ph.D.

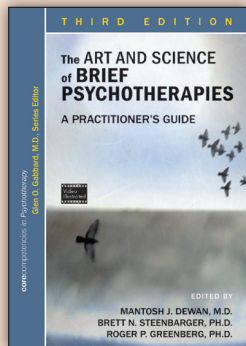

Each chapter is thoroughly updated, and new chapters cover such topics as dialectical behavior therapy, multicultural practice, and mentalizing, as well as fresh approaches to intervention, such as telepsychiatry and Internet-based interventions.

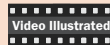

2018 • 397 pages • ISBN 978-1-61537-079-5 • Paperback • \$87.00 • Item #37079

2018 • 397 pages • ISBN 978-1-61537-151-8 • eBook • \$70.00 • Item #37151

AMERICAN  
 PSYCHIATRIC  
 ASSOCIATION  
 PUBLISHING

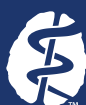

www.appl.org  
 Email: appl@psych.org  
 Phone: 1-800-368-5777

AH1822A

## Subscription and Business Information

*The American Journal of Psychiatry*, ISSN 0002-953X, is published monthly by the American Psychiatric Association.

The American Psychiatric Association does not hold itself responsible for statements made in its publications by contributors or advertisers. Unless so stated, material in *The American Journal of Psychiatry* does not reflect the endorsement, official attitude, or position of the American Psychiatric Association or of the Journal's Editorial Board.

Periodicals postage paid at Washington, DC, and additional mailing offices. POSTMASTER: Send address changes to *The American Journal of Psychiatry*, Circulation Department, American Psychiatric Association, 800 Maine Avenue, S.W., Suite 900, Washington, D.C. 20024.

### Editorial Office

*American Journal of Psychiatry*  
American Psychiatric Association  
800 Maine Avenue, S.W., Suite 900  
Washington, D.C. 20024  
E-mail: [ajp@psych.org](mailto:ajp@psych.org)

### Customer Service

Phone: (800) 368-5777 (toll-free)  
E-mail: [appi@psych.org](mailto:appi@psych.org)

### APA Member Subscription Services

Phone: (888) 35-PSYCH (toll-free)

### Subscriptions

Per year: individual \$333.00,  
international \$500.00

Institutional subscriptions are tier priced. For institutional site license or pricing information, contact (202) 559-3729 or [institutions@psych.org](mailto:institutions@psych.org).

*Additional subscription options, including single issues and student rates*  
Contact Customer Service

### Advertising

*Pharmaceutical Print and Online Advertising*  
Frank Cox, Kathleen Harrison, Tim Wolfinger  
Pharmaceutical Media, Inc.  
30 East 33rd Street  
New York, NY 10016  
Phone: (212) 904-0379  
E-mail: [twolfinger@pminy.com](mailto:twolfinger@pminy.com)

### *Nonpharmaceutical and Online Sales*

Eamon Wood  
Pharmaceutical Media, Inc.  
E-mail: [ewood@pminy.com](mailto:ewood@pminy.com)  
(see address and phone above).

### Permissions and Reprints

Material published in the journals of the American Psychiatric Association and American Psychiatric Association Publishing is protected by copyright and all rights are reserved. Material may not be reproduced in any form or by any means without written permission from the copyright owner. For permission to reproduce material published by APA, please visit <http://www.appi.org/customer-service/permissions> for more information. Permission can also be secured through the Copyright Clearance Center ([www.copyright.com](http://www.copyright.com)).

APA does not require that permission be obtained for the photocopying of isolated articles for nonprofit classroom or library reserve use; all fees associated with such permission are waived. This consent does not extend to other kinds of copying, such as copying for general distribution, for advertising or promotional purposes, for creating new collective works, or for resale. Requests for commercial distribution should be directed to (202) 609-7075.

For bulk reprints, please contact Jane Cha, (202) 609-7075; e-mail: [jcha@psych.org](mailto:jcha@psych.org).

Indexed in Abstracts for Social Workers, Academic Abstracts, Biological Abstracts, Chemical Abstracts, Chicago Psychoanalytic Literature Index, Cumulative Index to Nursing Literature, Excerpta Medica, Hospital Literature Index, Index Medicus, International Nursing Index, Nutrition Abstracts, Psychological Abstracts, Science Citation Index, Social Science Source, and Social Sciences Index.

Pages are produced by Sheridan Journal Services (Waterbury, VT) and printed by Sheridan NH (Hanover, NH) on acid-free paper effective with Volume 169, Number 1, January 2012.

© 2018 American Psychiatric Association.



# Methylphenidate hydrochloride extended-release tablets USP, for oral use CII

**BRIEF SUMMARY:** Consult the Full Prescribing Information for complete product information.

## WARNING: DRUG DEPENDENCE

See full prescribing information for complete boxed warning.

**Methylphenidate hydrochloride extended-release tablets should be given cautiously to patients with a history of drug dependence or alcoholism. Chronic abusive use can lead to marked tolerance and psychological dependence, with varying degrees of abnormal behavior.**

## INDICATIONS AND USAGE

Methylphenidate hydrochloride extended-release tablets USP is a CNS stimulant indicated for the treatment of Attention Deficit Hyperactivity Disorder (ADHD) in children 6 years of age and older, adolescents, and adults up to the age of 65.

## CONTRAINDICATIONS

Known hypersensitivity to the product. Marked anxiety, tension, or agitation. Glaucoma. Tics or a family history or diagnosis of Tourette's syndrome. Do not use methylphenidate hydrochloride extended-release tablets in patients currently using or within 2 weeks of using an MAO inhibitor.

## WARNINGS AND PRECAUTIONS

**Serious Cardiovascular Events:** Sudden death has been reported in association with CNS stimulant treatment at usual doses in children and adolescents with structural cardiac abnormalities or other serious heart problems. Sudden death, stroke, and myocardial infarction have been reported in adults taking stimulant drugs at usual doses for ADHD. Stimulant products generally should not be used in patients with known structural cardiac abnormalities, cardiomyopathy, serious heart rhythm abnormalities, coronary artery disease, or other serious heart problems.

**Increase in Blood Pressure:** Monitor patients for changes in heart rate and blood pressure and use with caution in patients for whom an increase in blood pressure or heart rate would be problematic.

**Psychiatric Adverse Events:** Use of stimulants may cause treatment-emergent psychotic or manic symptoms in patients with no prior history, or exacerbation of symptoms in patients with preexisting psychiatric illness. Clinical evaluation for Bipolar Disorder is recommended prior to stimulant use. Monitor for aggressive behavior.

**Seizures:** Stimulants may lower the convulsive threshold. Discontinue in the presence of seizures.

**Priapism:** cases of painful and prolonged penile erections and priapism have been reported with methylphenidate products. Immediate medical attention should be sought if signs or symptoms of painful or prolonged penile erections or priapism are observed.

**Peripheral Vasculopathy, including Raynaud's Phenomenon:** Stimulants used to treat ADHD are associated with peripheral vasculopathy, including Raynaud's phenomenon. Careful observation for digital changes is necessary during treatment with ADHD stimulants.

**Visual Disturbance:** difficulties with accommodation and blurring of vision have been reported with stimulant treatment.

**Long-Term Suppression of Growth:** monitor height and weight at appropriate intervals in pediatric patients.

**Gastrointestinal obstruction with preexisting GI narrowing.**

**Hematologic monitoring:** Periodic CBC, differential, and platelet counts are advised during prolonged therapy.

## ADVERSE REACTIONS

The most common adverse reaction in double-blind clinical trials (>5%) in children and adolescents was abdominal pain upper. The most common adverse reactions in double-blind clinical trials (>5%) in adult patients were decreased appetite, headache, dry mouth, nausea, insomnia, anxiety, dizziness, weight decreased, irritability, and hyperhidrosis.

The most common adverse reactions associated with discontinuation ( $\geq 1\%$ ) from either pediatric or adult clinical trials were anxiety, irritability, insomnia, and blood pressure increased. The development program for methylphenidate hydrochloride extended-release tablets included exposures in a total of 3906 participants in clinical trials. Children, adolescents, and adults with ADHD were evaluated in 6 controlled clinical studies and 11 open-label clinical studies. Safety was assessed by collecting adverse events, vital signs, weights, and ECGs, and by performing physical examinations and laboratory analyses.

Adverse reactions in either the pediatric or adult double-blind adverse reactions tables may be relevant for both patient populations.

**Adverse Reactions Reported by  $\geq 1\%$  of methylphenidate hydrochloride extended-release tablets-Treated Children and Adolescent Subjects**

4 Placebo-Controlled, Double-Blind Clinical Trials of methylphenidate hydrochloride extended-release tablets – methylphenidate hydrochloride extended-release tablets (n=321), Placebo (n=318):

Abdominal pain upper (6.2, 3.8), Vomiting (2.8, 1.6), Nasopharyngitis (2.8, 2.2), Pyrexia (2.2, 0.9), Insomnia\* (2.8, 0.3), Cough (1.9, 0.9), Dizziness (1.9, 0), Oropharyngeal pain (1.2, 0.9)

\* Terms of Initial insomnia (methylphenidate hydrochloride extended-release tablets =0.6%) and Insomnia (methylphenidate hydrochloride extended-release tablets =2.2%) are combined into Insomnia.

**Adverse Reactions Reported by  $\geq 1\%$  of methylphenidate hydrochloride extended-release tablets-Treated Adult Subjects**

2 Placebo-Controlled, Double-Blind Clinical Trials\* – methylphenidate hydrochloride extended-release tablets (n=415), Placebo (n=212):

Decreased appetite (25.3, 6.6), Headache (22.2, 15.6), Dry mouth (14.0, 3.8), Nausea (12.8, 3.3), Insomnia (12.3, 6.1), Anxiety (8.2, 2.4), Dizziness (6.7, 5.2), Weight decreased (6.5, 3.3), Irritability (5.8, 1.4), Hyperhidrosis (5.1, 0.9), Tachycardia (4.8, 0), Initial insomnia (4.3, 2.8), Depressed mood (3.9, 1.4), Nervousness (3.1, 0.5), Palpitations (3.1, 0.9), Restlessness (3.1, 0), Tremor (2.7, 0.5), Dyspepsia (2.2, 0.9), Agitation (2.2, 0.5), Upper respiratory tract infection (2.2, 0.9), Muscle tightness (1.9, 0), Vertigo (1.7, 0), Vision blurred (1.7, 0.5), Vomiting (1.7, 0.5), Anorexia (1.7, 0), Aggression (1.7, 0.5), Bruxism (1.7, 0.5), Depression (1.7, 0.9), Libido decreased (1.7, 0.5), Oropharyngeal pain (1.7, 1.4), Affect lability (1.4, 0.9), Constipation (1.4, 0.9), Paresthesia (1.2, 0), Sedation (1.2, 0), Tension headache (1.2, 0.5), Confusional state (1.2, 0), Tension (1.2, 0.5)

\*Included doses up to 108 mg.

The majority of ADRs were mild to moderate in severity for children, adolescents and adult subjects.

## DRUG INTERACTIONS

### MAO Inhibitors

Methylphenidate hydrochloride extended-release tablets should not be used in patients being treated (currently or within the preceding 2 weeks) with MAO inhibitors.

### Vasopressor Agents

Because of possible increases in blood pressure, methylphenidate hydrochloride extended-release tablets should be used cautiously with vasopressor agents [see Warnings and Precautions].

### Coumarin Anticoagulants, Antidepressants, and Selective Serotonin Reuptake Inhibitors

Human pharmacologic studies have shown that methylphenidate may inhibit the metabolism of coumarin anticoagulants, anticonvulsants (eg, phenobarbital, phenytoin, primidone), and some antidepressants (tricyclics and selective serotonin reuptake inhibitors). Downward dose adjustment of these drugs may be required when given concomitantly with methylphenidate. It may be necessary to adjust the dosage and monitor plasma drug concentrations (or, in the case of coumarin, coagulation times), when initiating or discontinuing concomitant methylphenidate.

## USE IN SPECIFIC POPULATIONS

### Pregnancy Category C

Methylphenidate has been shown to have teratogenic effects in rabbits when given in doses of 200 mg/kg/day, which is approximately 100 times and 40 times the maximum recommended human dose on a mg/kg and mg/m<sup>2</sup> basis, respectively. A reproduction study in rats revealed no evidence of harm to the fetus at oral doses up to 30 mg/kg/day, approximately 15-fold and 3-fold the maximum recommended human dose of methylphenidate hydrochloride extended-release tablets on a mg/kg and mg/m<sup>2</sup> basis, respectively. The approximate plasma exposure to methylphenidate plus its main metabolite PPAA in pregnant rats was 1–2 times that seen in trials in volunteers and patients with the maximum recommended dose of methylphenidate hydrochloride extended-release tablets based on the AUC. The safety of methylphenidate for use during human pregnancy has not been established. There are no adequate and well-controlled studies in pregnant women. Methylphenidate hydrochloride extended-release tablets should be used during pregnancy only if the potential benefit justifies the potential risk to the fetus.

### Labor and Delivery

The effect of methylphenidate hydrochloride extended-release tablets on labor and delivery in humans is unknown.

### Nursing Mothers

It is not known whether methylphenidate is excreted in human milk. Because many drugs are excreted in human milk, caution should be exercised if methylphenidate hydrochloride extended-release tablets is administered to a nursing woman. In lactating female rats treated with a single oral dose of 5 mg/kg radiolabeled methylphenidate, radioactivity (representing methylphenidate and/or its metabolites) was observed in milk and levels were generally similar to those in plasma.

### Pediatric Use

Methylphenidate hydrochloride extended-release tablets should not be used in children under six years, since safety and efficacy in this age group have not been established. Long-term effects of methylphenidate in children have not been well established.

### Geriatric Use

Methylphenidate hydrochloride extended-release tablets have not been studied in patients greater than 65 years of age.

## DRUG ABUSE AND DEPENDENCE

### Controlled Substance

Methylphenidate is a Schedule II controlled substance under the Controlled Substances Act.

### Abuse

As noted in the Box Warning, methylphenidate hydrochloride extended-release tablets should be given cautiously to patients with a history of drug dependence or alcoholism. Chronic abusive use can lead to marked tolerance and psychological dependence with varying degrees of abnormal behavior. Frank psychotic episodes can occur, especially with parenteral abuse.

In two placebo-controlled human abuse potential studies, single oral doses of methylphenidate hydrochloride extended-release tablets were compared to single oral doses of immediate-release methylphenidate (IR MPH) and placebo in subjects with a history of recreational stimulant use to assess relative abuse potential. For the purpose of this assessment, the response for each of the subjective measures was defined as the maximum effect within the first 8 hours after dose administration.

In one study (n=40), both methylphenidate hydrochloride extended-release tablets (108 mg) and 60 mg IR MPH compared to placebo produced statistically significantly greater responses on the five subjective measures suggestive of abuse potential. In comparisons between the two active treatments, however, methylphenidate hydrochloride extended-release tablets (108 mg) produced variable responses on positive subjective measures that were either statistically indistinguishable from (Abuse Potential, Drug Liking, Amphetamine, and Morphine Benzidine Group [Euphoria]) or statistically less than (Stimulation – Euphoria) responses produced by 60 mg IR MPH.

In another study (n=49), both doses of methylphenidate hydrochloride extended-release tablets (54 mg and 108 mg) and both doses of IR MPH (50 mg and 90 mg) produced statistically significantly greater responses compared to placebo on the two primary scales used in the study (Drug Liking, Euphoria). When doses of methylphenidate hydrochloride extended-release tablets (54 mg and 108 mg) were compared to IR MPH (50 mg and 90 mg, respectively) methylphenidate hydrochloride extended-release tablets produced statistically significantly lower subjective responses on these two scales than IR MPH. Methylphenidate hydrochloride extended-release tablets (108 mg) produced responses that were statistically indistinguishable from the responses on these two scales produced by IR MPH (50 mg). Differences in subjective responses to the respective doses should be considered in the context that only 22% of the total amount of methylphenidate in methylphenidate hydrochloride extended-release tablets is available for immediate release from the drug overcoat.

Although these findings reveal a relatively lower response to methylphenidate hydrochloride extended-release tablets on subjective measures suggestive of abuse potential compared to IR MPH at roughly equivalent total MPH doses, the relevance of these findings to the abuse potential of methylphenidate hydrochloride extended-release tablets in the community is unknown.

### Dependence

As noted in the Box Warning, careful supervision is required during withdrawal from abusive use since severe depression may occur. Withdrawal following chronic therapeutic use may unmask symptoms of the underlying disorder that may require follow-up.

## OVERDOSAGE

Signs and symptoms of methylphenidate hydrochloride extended-release tablets overdose, resulting principally from overstimulation of the CNS and from excessive sympathomimetic effects, may include the following: vomiting, agitation, muscle twitching, convulsion, grand mal convulsion, confusional state, hallucinations (auditory and/or visual), hyperhidrosis, headache, pyrexia, tachycardia, palpitations, heart rate increased, sinus arrhythmia, hypertension, rhabdomyolysis, mydriasis, and dry mouth.

Treatment consists of appropriate supportive measures. The patient must be protected against self-injury and against external stimuli that would aggravate overstimulation already present. Gastric contents may be evacuated by gastric lavage as indicated. Before performing gastric lavage, control agitation and seizures if present and protect the airway. Other measures to detoxify the gut include administration of activated charcoal and a cathartic. Intensive care must be provided to maintain adequate circulation and respiratory exchange; external cooling procedures may be required for pyrexia.

Efficacy of peritoneal dialysis or extracorporeal hemodialysis for methylphenidate hydrochloride extended-release tablets overdose has not been established. The prolonged release of methylphenidate from methylphenidate hydrochloride extended-release tablets should be considered when treating patients with overdose.

As with the management of all overdose, the possibility of multiple-drug ingestion should be considered. The physician may wish to consider contacting a poison control center for up-to-date information on the management of overdose with methylphenidate.

Distributed by: TRIGEN LABORATORIES, LLC  
Bridgewater, NJ 08807  
www.trigenlab.com  
Customer Service: 1-866-600-4799  
PM-US-MTH-0029

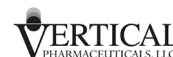

72  
mgONCE-DAILY  
Methylphenidate ER  
methylphenidate HCl  
EXTENDED-RELEASE TABLETS

72

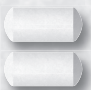

THE NEW 2x36

Not actual tablet image—72 is not representative of imprint. Not actual tablet size.

## Introducing the first and only 72-mg methylphenidate ER tablet available for ADHD patients aged 13-65.<sup>1,2</sup>

[Learn more at www.methylphenidate72.com.](http://www.methylphenidate72.com)

### The only product to demonstrate bioequivalence to two 36-mg branded methylphenidate HCl extended-release tablets<sup>2</sup>

Pharmacokinetic study of mean methylphenidate plasma concentration over time — Administration of one Methylphenidate ER 72-mg tablet vs two 36-mg branded methylphenidate HCl extended-release tablets<sup>2</sup>

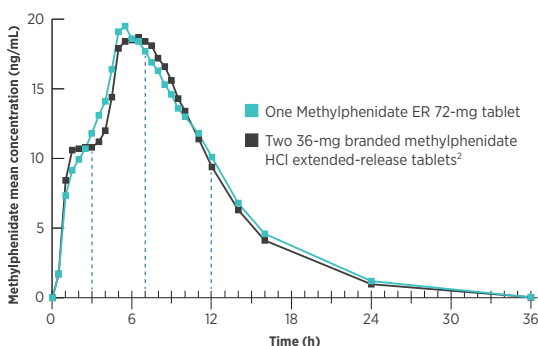

**Per revised FDA guidance in 2014**, additional bioequivalence metrics are required to ensure that a new methylphenidate ER alternative is therapeutically equivalent to branded methylphenidate HCl extended-release tablets.<sup>3</sup>

| Metrics          | Meets FDA Bioequivalence Criteria |
|------------------|-----------------------------------|
| C <sub>max</sub> | ✓                                 |
| AUC (0-∞)        | ✓                                 |
| AUC (0-3)        | ✓                                 |
| AUC (3-7)        | ✓                                 |
| AUC (7-12)       | ✓                                 |

A single-dose, two-treatment, four-period, two-sequence, fully replicated crossover in-vivo study was conducted in 60 healthy volunteers to compare one Methylphenidate ER 72-mg tablet to two 36-mg branded methylphenidate HCl extended-release tablets.<sup>2</sup>

### Indication and Important Safety Information

The 72-mg methylphenidate hydrochloride extended-release tablet USP is a CNS stimulant indicated for the treatment of Attention Deficit Hyperactivity Disorder (ADHD) in adolescents 13 years of age and older, and adults up to the age of 65.

#### WARNING: DRUG DEPENDENCE

##### See full prescribing information for complete boxed warning.

Methylphenidate hydrochloride extended-release tablets should be given cautiously to patients with a history of drug dependence or alcoholism. Chronic abuse can lead to marked tolerance and psychological dependence, with varying degrees of abnormal behavior.

- Methylphenidate hydrochloride extended-release tablets should not be used in patients with known hypersensitivity to the product; marked anxiety, tension, or agitation; glaucoma; tics or a family history or diagnosis of Tourette's syndrome; or in patients currently using or within 2 weeks of using an MAO inhibitor
- Methylphenidate is a stimulant. Stimulants should not be used in patients with known structural cardiac abnormalities, cardiomyopathy, serious heart rhythm abnormalities, coronary artery disease, or other serious heart problems. Stimulants should be used with caution in patients with a history of high blood pressure or increased heart rate. Patients with a history of high blood pressure and for whom methylphenidate is deemed an appropriate therapy should be monitored for changes in heart rate and blood pressure
- Use of stimulants may cause treatment-emergent psychotic or manic symptoms in patients with no prior psychiatric history. Stimulants may also exacerbate psychiatric symptoms in patients with preexisting psychiatric illness
- Stimulants may lower the convulsive threshold in patients with epilepsy, potentially leading to seizures. Stimulants should not be taken in the presence of seizures

- Immediate medical attention should be sought if signs or symptoms of prolonged penile erections (priapism) are observed
- Careful observation for peripheral vasculopathy in extremities, including but not limited to Raynaud's phenomenon, is necessary during treatment with ADHD stimulants
- Pediatric patients should be monitored for height and weight at age-appropriate intervals for potential long-term suppression of growth
- Difficulties with accommodation and blurring of vision have been reported with stimulant treatment. Patients with a history of glaucoma should not take stimulants
- This extended-release tablet is nondeformable and does not appreciably change in shape in the GI tract; therefore, gastrointestinal obstruction may potentially occur in patients with prior history of GI narrowing
- Periodic complete blood count (CBC) with differential and platelet counts are advised during prolonged therapy
- The most common adverse reaction in double-blind clinical trials (>5%) in children and adolescents was upper abdominal pain. The most common adverse reactions in double-blind clinical trials (>5%) in adult patients were decreased appetite, headache, dry mouth, nausea, insomnia, anxiety, dizziness, weight decrease, irritability, and hyperhidrosis

Please see Important Safety Information above and Brief Summary of Prescribing Information on next page, including **Box Warning**.

**References:** 1. Methylphenidate hydrochloride extended-release tablets [package insert]. Trigen Laboratories, LLC; 2017. 2. Data on file. Osmotica Pharmaceutical US LLC. 3. US Food and Drug Administration. Draft Guidance on Methylphenidate Hydrochloride. Revision: November 2014.

Distributed by: TRIGEN LABORATORIES, LLC  
Bridgewater, NJ 08807  
www.trigenlab.com  
Customer Service: 1-866-600-4799  
PM-US-MTH-0016

**VERTICAL**  
PHARMACEUTICALS, LLC
