# The American Journal of Psychiatry

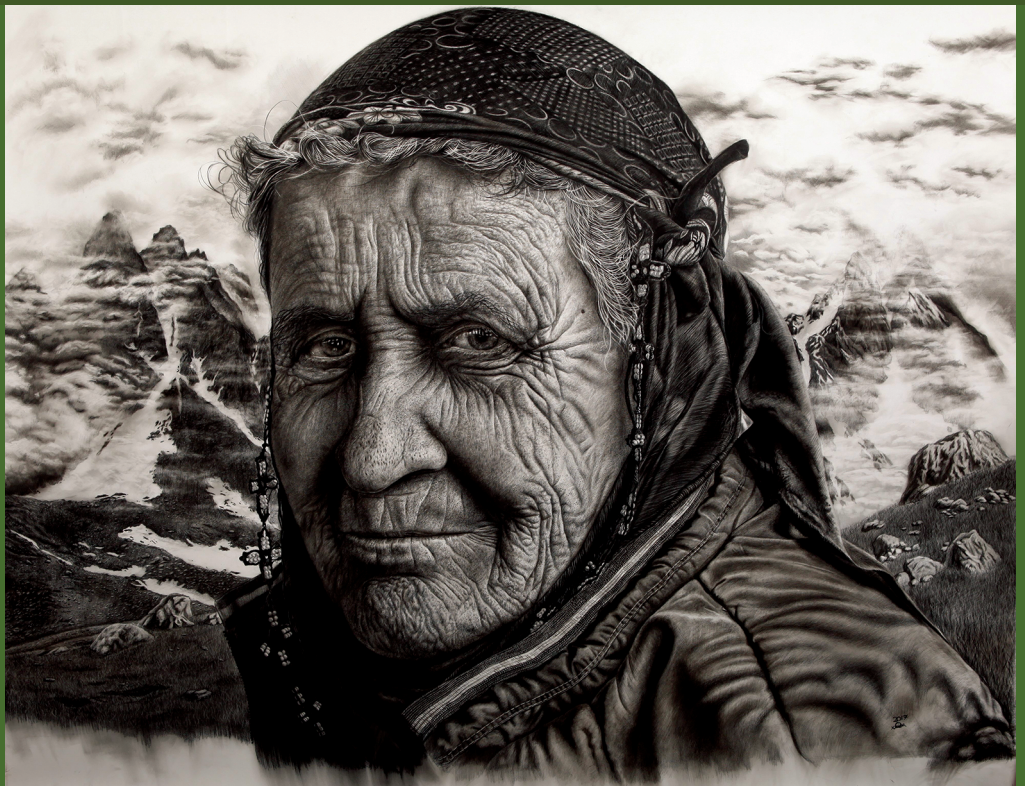

Analysis of DNA Methylation in Young People: Limited Evidence for an Association Between Victimization Stress and Epigenetic Variation in Blood

Longitudinal Association of Amyloid Beta and Anxious-Depressive Symptoms in Cognitively Normal Older Adults

Service Use Preceding Opioid-Related Fatality

Continuation of Atypical Antipsychotic Medication During Early Pregnancy and the Risk of Gestational Diabetes
