## PERSPECTIVAS

### EDITORIALES

- 491 Consideración de la firma genética y epigenética de la adversidad temprana en un marco biopsicosocial**  
*Rachel Yehuda, Ph.D., Janine D. Flory, Ph.D.*
- 493 Nuevas pistas sobre la enfermedad de Alzheimer preclínica**  
*Paul B. Rosenberg, M.D., Constantine G. Lyketsos, M.D., M.H.S.*
- 495 ¿Dónde está nuestro Lin Zexu? Un llamamiento al liderazgo y a los recursos para combatir la epidemia de opiáceos**  
*John Rotrosen, M.D.*
- 498 Riesgo de diabetes gestacional durante el tratamiento con medicamentos antipsicóticos**  
*John W. Newcomer, M.D., Ginger E. Nicol, M.D., C.E.D.S.*

### COMMENTARIO

- 500 [Anxiety About Antidepressants]**  
*Roy H. Perlis, M.D., M.Sc.*

### TRATAMIENTO EN PSIQUIATRÍA

- 502 Psicosis cicloide**  
*Rif S. El-Mallakh, M.D., Carolyn Furdek, D.P.T.* **EMC • AUDIO**

### IMÁGENES EN PSIQUIATRÍA

- 506 Trauma, creatividad y trance: Habilidad especial en un caso de trastorno de identidad disociativo**  
*Vedat Şar, M.D., et al.*

### REVISIÓN Y RESEÑAS

- 508 175 Años de progreso en terapéutica para el TEPT: Aprender del pasado**  
*Murray B. Stein, M.D., M.P.H., Barbara O. Rothbaum, Ph.D., A.B.P.P.*

## NUEVAS INVESTIGACIONES

### ARTÍCULOS

- 517 Análisis de la metilación de ADN en gente joven: Evidencia limitada de una asociación entre el estrés por victimización y la variación epigenética en la sangre**  
*Sarah J. Marzi, Ph.D., et al.* **EDITORIALE • EMC • AUDIO**
- 530 Asociación longitudinal de beta-amiloide y síntomas ansioso-depresivos en adultos mayores cognitivamente normales**  
*Nancy J. Donovan, M.D., et al.* **EDITORIALE • VIDEO**
- 538 Uso de servicios médicos antes de la fatalidad relacionada con opiáceos**  
*Mark Olfson, M.D., M.P.H., et al.* **EDITORIALE • EMC • AUDIO • GUÍAS CLÍNICAS**
- 545 Análisis genético molecular subdividido por exposición a la adversidad sugiere heterogeneidad etiológica en la depresión mayor**  
*Roseann E. Peterson, Ph.D., et al.* **EDITORIALE • AUDIO • VIDEO**
- 555 Puntuación de riesgo poligénica para la enfermedad de Alzheimer: Implicaciones para el desempeño de la memoria y los volúmenes del hipocampo en los primeros años de vida**  
*Luiza K. Axelrud, et al.* **EDITORIALE**
- 564 Continuación de la medicación antipsicótica atípica durante el embarazo temprano y el riesgo de diabetes gestacional**  
*Yoonyoung Park, Sc.D., et al.* **EDITORIALE • AUDIO • GUÍAS CLÍNICAS**

## CARTAS AL EDITOR

- 575 Ninguna asociación entre la eficacia de los antidepresivos y rs28365143 en la proteína de unión a la hormona liberadora de corticotropina en un meta-análisis extenso  
*Chiara Fabbri, M.D., et al.*
- 576 Requerida más investigación sobre la asociación entre genotipo y la respuesta a los antidepresivos: Respuesta a Fabbri et al.  
*Leanne M. Williams, Ph.D.*
- 577 ¿Dónde está la discusión sobre la colina y la exposición fetal al alcohol  
*Carl C. Bell, M.D., D.L.F.A.P.A., Jessie Ajula*
- 578 El papel del riesgo perinatal en vías del neurodesarrollo hacia la conducta disruptiva en la infancia temprana: Respuesta a Bell y Ajula  
*Lauren S. Wakschlag, Ph.D., Daniel S. Pine, M.D.*
- 578 Consumo de alcohol en un estudio de suplemento de fosfatidilcolina en el embarazo: Respuesta a Bell y Ajula  
*Robert Freedman, M.D.*
- 579 El uso de carbamazepina para expedir el metabolismo de la inyección de acción prolongada de risperidona por medio de la inducción de CYP3A4 en un paciente con síntomas extrapiramidales  
*Paul A. Fuchs, M.D., M.P.H., et al.*
- 580 "Un verdadero psiquiatra no debe ver nada que no esté en Kraepelin": ¿Y Freud?  
*Thomas Lepoutre, Ph.D.*

## RESEÑAS BIBLIOGRÁFICAS

- 581 Healthier: Fifty Thoughts on the Foundations of Population Health [Más saludable: Cincuenta pensamientos acerca de los fundamentos de la salud de la población]  
*Lloyd I. Sederer, M.D.*
- 582 A New Understanding of Mental Disorders: Computational Models for Dimensional Psychiatry [Un nuevo entendimiento de los trastornos mentales: Modelos computacionales para la psiquiatría dimensional]  
*Carmen Andreescu, M.D., Howard Aizenstein, M.D., Ph.D.*

## OTROS TEMAS DE INTERÉS

- 574 [Corrections]
- 583 Educación Médica Continuada

**Cubierta:** [Charcoal drawing produced in a trance-like state by a 19-year-old man with dissociative identity disorder described in this issue's Images in Psychiatry (p. 506). (Drawing provided with permission, from both the patient and the subject.)]

**La Tabla de Contenidos y resúmenes de Este Número Está Disponible en Español**

[This issue's Table of Contents is available in Spanish]  
(Abstracts are also available in Spanish)

Translation presented in collaboration with the Office of Global Health,  
Rutgers-Robert Wood Johnson Medical School

Support for this effort provided by ACTA Colombia.

**Translation courtesy of**

**Sergi Casals, M.A.**, Garuna, Medellín, Colombia ([www.garunaeditors.com](http://www.garunaeditors.com))  
**Carlos López Jaramillo, M.D., M.Sc., Ph.D.**, Universidad de Antioquia, Medellín, Colombia  
**Javier I. Escobar, M.D., M.Sc.**, Rutgers-Robert Wood Johnson Medical School

**AUDIO** Highlighted in AJP Audio, a downloadable .mp3 file available at [ajp.psychiatryonline.org](http://ajp.psychiatryonline.org)

**EMC** A course covering the content of this article is available online for paid subscribers to the AJP CME Course program

**EDITORIAL** Discussed in one of the issue's editorials

**GUÍAS CLÍNICAS** Clinical Guidance provided on the English table of contents

**VIDEO** Highlighted online by Deputy Editor Daniel S. Pine, M.D.

## 175 Años de progreso en terapéutica para el TEPT: Aprender del pasado

Murray B. Stein, M.D., M.P.H., Barbara O. Rothbaum, Ph.D., A.B.P.P.

Los factores traumáticos que generan estrés han sido siempre parte de la vida. Lo que ahora conocemos como trastorno por estrés posttraumático (TEPT) se estudió por primera vez en el contexto de trauma militar durante la Guerra Civil Estadounidense y la Primera Guerra Mundial, pero más extensivamente en la Segunda Guerra Mundial. Mucho de lo que se sabe del manejo médico y psicológico del TEPT tiene sus orígenes en los enfoques psiquiátricos militares, y una revisión de esas prácticas revela principios importantes que deberían aplicarse en el tratamiento actual de TEPT, tanto militar como no militar. Dichas prácticas incluyen: la intervención lo antes posible después de la exposición traumática; la provisión de un medio terapéutico seguro de apoyo, diseñado para el re-

torno relativamente rápido de un individuo a sus responsabilidades y actividades normales; y utilizar una combinación de farmacoterapia y psicoterapia (especialmente exposición al recuerdo traumático). Una revisión de las guías actuales de tratamiento de TEPT revela que son pocos los tratamientos respaldados con gran certeza, en gran parte debido a la escasez de ensayos clínicos, particularmente de farmacoterapia. Esta carencia debe corregirse para permitir que los avances prometedores en la neurociencia del miedo puedan traducirse en los avances terapéuticos que los pacientes necesitan y se merecen.

*(Am J Psychiatry 2018; 175:508–516)*

## Análisis de la metilación de ADN en gente joven: Evidencia limitada de una asociación entre el estrés por victimización y la variación epigenética en la sangre

Sarah J. Marzi, Ph.D., Karen Sugden, Ph.D., Louise Arseneault, Ph.D., Daniel W. Belsky, Ph.D., Joe Burtage, Ph.D., David L. Corcoran, Ph.D., Andrea Danese, M.D., Ph.D., Helen L. Fisher, Ph.D., Eilis Hannon, Ph.D., Terrie E. Moffitt, Ph.D., Candice L. Odgers, Ph.D., Carmine Pariante, M.D., Ph.D., Richie Poulton, Ph.D., Benjamin S. Williams, B.Sc., Chloe C.Y. Wong, Ph.D., Jonathan Mill, Ph.D., Avshalom Caspi, Ph.D.

**Objetivo:** Se ha propuesto la metilación de ADN como un mecanismo epigenético por medio del cual las experiencias en las primeras etapas de la vida se "incorporan" al genoma y alteran los procesos transcripcionales para comprometer la salud. Los autores se propusieron investigar si el estrés por victimización en las primeras etapas de la vida está asociado a la metilación de ADN del genoma completo.

**Método:** Los autores pusieron a prueba la hipótesis de que la victimización está asociada a la metilación de ADN, en el Estudio Longitudinal de Riesgo del Entorno (E-Risk), una cohorte de nacimiento 1994–1995 representativa a escala nacional de gemelos nacidos en Inglaterra y Gales y evaluados a las edades de 5, 7, 10, 12 y 18 años. Se determinaron múltiples formas de victimización en la infancia y la adolescencia (incluyendo el maltrato físico, sexual y emocional; el descuido; la exposición a violencia por parte de la pareja íntima; el *bullying*; la ciber-victimización y el delito).

**Resultados:** Los análisis del epigenoma completo de polivictimización a lo largo de la infancia y la adolescencia revelaron pocas asociaciones significativas a la metilación de ADN

en la sangre periférica a los 18 años de edad, pero dichos análisis incluían variables de confusión como el consumo de tabaco y no superaron las pruebas de control de co-gemelos. Análisis secundarios de formas específicas de victimización revelaron asociaciones escasas a la metilación de ADN, que no se replicaron en diferentes versiones operativas de la misma experiencia putativa de victimización. Los análisis guiados por hipótesis de seis genes candidatos en la respuesta al estrés (NR3C1, FKBP5, BDNF, AVP, CRHR1, SLC6A4) no revelaron asociaciones predichas a la metilación del ADN en sondas relacionadas con estos genes.

**Conclusiones:** Los hallazgos de este análisis epidemiológico de los efectos epigenéticos del estrés en etapas tempranas de la vida no apoyan la hipótesis de cambios importantes en la metilación de ADN en personas jóvenes victimizadas. Necesitamos aceptar la posibilidad de que todavía no exista una buena correspondencia entre la epidemiología epigenética y los modelos experimentales no humanos para descubrir la incorporación biológica del estrés.

(*Am J Psychiatry* 2018; 175:517–529)

## Asociación longitudinal de beta-amiloide y síntomas ansioso-depresivos en adultos mayores cognitivamente normales

Nancy J. Donovan, M.D., Joseph J. Locascio, Ph.D., Gad A. Marshall, M.D., Jennifer Gatchel, M.D., Ph.D., Bernard J. Hanseeuw, M.D., Ph.D., Dorene M. Rentz, Psy.D., Keith A. Johnson, M.D., Reisa A. Sperling, M.D., for the Harvard Aging Brain Study

**Objetivo:** Para entender el papel de los síntomas depresivos en la enfermedad de Alzheimer preclínica es esencial definir su relación temporal con las proteinopatías del Alzheimer en adultos mayores cognitivamente normales. El objetivo del estudio fue examinar asociaciones de beta-amiloide cerebral y medidas longitudinales de depresión y grupos de síntomas depresivos en una muestra cognitivamente normal de adultos mayores.

**Método:** A un total de 270 individuos mayores, residentes en la comunidad y cognitivamente normales se les realizó una tomografía por emisión de positrones (PET) con el Compuesto Pittsburgh B (PiB) al inicio del estudio para registrar las medidas de beta-amiloide cortical, y evaluaciones anuales con la Escala de Depresión Geriátrica (GDS) de 30 ítems. Los autores evaluaron la unión continua del PiB como un predictor de la puntuación en la escala GDS o de un subgrupo de la escala GDS, calculada como puntuaciones totales y puntuaciones medias para tres grupos de ítems de la escala GDS (apatía-anhedonia, disforia, y ansiedad-concentración), a lo largo del tiempo (de 1 a 5 años; media=3,8 años) en modelos separados de efectos mixtos con eliminación retrospectiva. Los predictores iniciales incluían la unión del PiB, edad, el sexo, la puntuación en el índice de Hollingshead, la puntuación en la prueba nacional estadounidense de lectura para adultos (AMNART), el estatus de la apolipoproteína E ε4, his-

torial de depresión y sus interacciones con el tiempo.

**Resultados:** Una unión alta del PiB predijo tasas aceleradas del aumento de la puntuación en la escala GDS en el tiempo, ajustando para historial de depresión. Una unión alta del PiB también predijo tasas mucho más pronunciadas de aumento de las puntuaciones de ansiedad-concentración, haciendo ajustes para el historial de depresión y la interacción entre la puntuación en AMNART y el tiempo. En un modelo post hoc que estimaba las puntuaciones de ansiedad sin ítems de perturbación de la concentración, la interacción entre la unión del PiB y el tiempo siguió siendo significativa.

**Conclusiones:** Una carga alta de beta-amiloide se asoció a un aumento de síntomas ansioso-depresivos con el tiempo en individuos mayores cognitivamente normales. El historial de depresión anterior se relacionó con mayor cantidad de síntomas, aunque no con empeoramiento de los mismos. Estos resultados sugieren una asociación directa o indirecta entre niveles altos de beta-amiloide y un empeoramiento de los síntomas ansioso-depresivos y apoyan la hipótesis de que los síntomas neuropsiquiátricos emergentes representan una manifestación temprana de la enfermedad de Alzheimer preclínica.

(*Am J Psychiatry* 2018; 175:530–537)

## Uso de servicios médicos antes de la fatalidad relacionada con opiáceos

Mark Olfson, M.D., M.P.H., Melanie Wall, Ph.D., Shuai Wang, Ph.D., Stephen Crystal, Ph.D., Carlos Blanco, M.D., Ph.D.

**Objetivo:** Este estudio analizó los patrones de servicios de salud antes de la muerte relacionada con opiáceos, en individuos que no habían alcanzado la tercera edad el programa *Medicaid*, centrándose en los fallecidos con y sin diagnósticos de dolor crónico no debido al cáncer en los últimos años.

**Método:** Los autores identificaron muertes relacionadas con opiáceos, de personas en el programa *Medicaid* cuya edad era  $\leq 64$  años, y caracterizaron sus diagnósticos clínicos, las prescripciones de medicamentos expedidas y los eventos no fatales de intoxicación durante los 30 días y los 12 meses anteriores a la muerte. El grupo de estudio incluyó 13.089 muertes relacionadas con opiáceos, que se dividieron de acuerdo a la presencia o ausencia de diagnósticos de dolor crónico no debido al cáncer en el último año de vida.

**Resultados:** La mayoría de los fallecidos (61,5%) habían recibido diagnósticos clínicos de afecciones de dolor crónico distintas al cáncer en el último año de vida. En comparación con los fallecidos sin diagnósticos de dolor crónico, era mucho más probable que los que habían recibido dichos diag-

nósticos hubieran llenado recetas para opiáceos (49,0% versus 17,2%) y benzodiazepinas (52,1% versus 26,6%) durante los últimos 30 días de vida, mientras que los diagnósticos de trastorno por consumo de opiáceos durante ese período fueron poco comunes en ambos grupos (4,2% versus 4,3%). El grupo de dolor crónico también tuvo una probabilidad significativamente más alta que el grupo sin dolor de recibir diagnósticos clínicos de trastornos por consumo de drogas (40,8% versus 22,1%), depresión (29,6% versus 13,0%) o ansiedad (25,8% versus 8,4%) durante el último año de vida.

**Conclusiones:** Las personas que murieron por causas relacionadas con los opiáceos, particularmente las que recibieron diagnósticos de afecciones con dolor crónico, normalmente recibieron servicios relacionados con los trastornos por consumo de droga y trastornos mentales en el último año de vida, aunque los diagnósticos de trastornos por consumo de opiáceos cerca del momento de la muerte fueron escasos.

(*Am J Psychiatry* 2018; 175:538–544)

## Análisis genético molecular subdividido por exposición a la adversidad sugiere heterogeneidad etiológica en la depresión mayor

Roseann E. Peterson, Ph.D., Na Cai, Ph.D., Andy W. Dahl, Ph.D., Tim B. Bigdeli, Ph.D., Alexis C. Edwards, Ph.D., Bradley T. Webb, Ph.D., Silviu-Alin Bacanu, Ph.D., Noah Zaitlen, Ph.D., Jonathan Flint, M.D., Kenneth S. Kendler, M.D.

**Objetivo:** Sigue sin estar claro hasta qué punto la depresión mayor es el resultado de un solo mecanismo biológico o si esta representa una vía final común de múltiples procesos de enfermedad. Los enfoques genéticos potencialmente pueden identificar la heterogeneidad etiológica en la depresión mayor clasificando los pacientes según su experiencia con eventos adversos importantes.

**Método:** Los datos son de China, Oxford y VCU (*Virginia Commonwealth University*), parte del proyecto de Investigación Experimental en Epidemiología Genética (CONVERGE), un estudio de mujeres Han de China con depresión mayor recurrente en una cohorte definida rigurosamente, evaluada cuidadosamente por factores de riesgo claves del entorno (N=9.599). Para detectar la heterogeneidad etiológica, se realizaron estudios de asociación del genoma completo, análisis de heredabilidad y análisis de interacción entre genes y entorno.

**Resultados:** Estudios de asociación del genoma completo estratificados por exposición a la adversidad revelaron tres

sitios (*loci*) nuevos asociados a la depresión mayor sólo en los participantes sin historial de adversidad. Se vieron interacciones genes-entorno entre la adversidad y el genotipo en todos tres sitios y 13,2% de la responsabilidad de la depresión mayor se puede atribuir a la interacción del genoma completo con la exposición a la adversidad. El riesgo genético en depresión mayor para participantes que reportaron eventos vitales adversos importantes (27%) fue compartido parcialmente con el de los participantes que no los reportaron (73%; correlación genética=+0,64). Junto con los resultados de estudios de simulación, estos hallazgos sugieren heterogeneidad etiológica dentro de la depresión mayor como una función de las exposiciones al entorno.

**Conclusiones:** Los aportes genéticos a la depresión mayor pueden diferir entre mujeres con y sin eventos vitales adversos importantes. Estos resultados tienen implicaciones para la disección molecular de la depresión mayor y otras enfermedades psiquiátricas y biomédicas complejas.

(*Am J Psychiatry* 2018; 175:545–554)

# Puntuación de riesgo poligénica para la enfermedad de Alzheimer: Implicaciones para el desempeño de la memoria y los volúmenes del hipocampo en los primeros años de vida

Luiza K. Axelrud, Marcos L. Santoro, Ph.D., Daniel S. Pine, M.D., Fernanda Talarico, Ary Gadelha, M.D., Ph.D., Gisele G. Manfro, M.D., Ph.D., Pedro M. Pan, M.D., Ph.D., Andrea Jackowski, M.D., Ph.D., Felipe Picon, M.D., M.Sc., Elisa Brietzke, M.D., Ph.D., Rodrigo Grassi-Oliveira, Ph.D., Rodrigo A. Bressan, M.D., Ph.D., Eurípedes C. Miguel, M.D., Ph.D., Luis A. Rohde, M.D., Ph.D., Hakon Hakonarson, M.D., Ph.D., Zdenka Pausova, M.D., Sintia Belangero, Ph.D., Tomas Paus, M.D., Ph.D., Giovanni A. Salum, M.D., Ph.D.

**Objetivo:** La enfermedad de Alzheimer es un trastorno neurodegenerativo heredable en el que los precursores en los primeros años de vida pueden manifestarse en la cognición y la estructura cerebral. Los autores evaluaron esta posibilidad examinando, en jóvenes, asociaciones entre la puntuación poligénica de riesgo para la enfermedad de Alzheimer, las habilidades cognitivas y el volumen del hipocampo.

**Método:** Los participantes fueron niños de entre 6 y 14 años de edad en dos ciudades de Brasil y constituyeron las muestras de descubrimiento (N=364) y replicación (N=352). Como una replicación adicional, se incluyeron datos de una muestra canadiense (N=1.029), con tareas muy bien definidas, protocolo de IRM y riesgo genético. Se usaron pruebas cognitivas para cuantificar la memoria y la función ejecutiva. Las habilidades de lectura y escritura se evaluaron con pruebas estandarizadas. Los volúmenes del hipocampo se derivaron del algoritmo de segmentación cerebral multi-atlas *Multiple Automatically Generated Templates* (IMAGeT). El riesgo genético de la enfermedad de Alzheimer se cuantificó utilizando estadística general del Proyecto Internacional de la Genómica de Alzheimer.

**Resultados:** Los análisis mostraron que para la muestra de

descubrimiento de Brasil, cada aumento de una unidad en la puntuación-z para la puntuación poligénica de riesgo de Alzheimer predijo significativamente una disminución de 0,185 en la puntuación-z para recuerdo inmediato y una disminución de 0,282 para recuerdo diferido. Los hallazgos fueron similares para la muestra de replicación de Brasil (recuerdo inmediato y diferido,  $\beta=-0,259$  y  $\beta=-0,232$ , ambos significativos). Regresiones por cuantiles (*quantiles*) mostraron volúmenes del hipocampo más reducidos bilateralmente para los individuos con puntuaciones poligénicas de riesgo altas. Las asociaciones no fueron significativas para la muestra canadiense.

**Conclusiones:** El riesgo genético de enfermedad de Alzheimer puede afectar la cognición y los volúmenes del hipocampo en los primeros años de vida, como se puede ver en dos muestras independientes. Estos datos apoyan la evidencia anterior de que algunas formas de demencia en las etapas tardías de la vida pueden representar afecciones del desarrollo con raíces en la infancia. Este resultado puede variar dependiendo del riesgo genético de una muestra y puede ser específico de algunos tipos de tareas de memoria.

(*Am J Psychiatry* 2018; 175:555–563)



# Continuación de la medicación antipsicótica atípica durante el embarazo temprano y el riesgo de diabetes gestacional

Yoonyoung Park, Sc.D., Sonia Hernandez-Diaz, M.D., Dr.P.H., Brian T. Bateman, M.D., M.Sc., Jacqueline M. Cohen, Ph.D., Rishi J. Desai, Ph.D., Elisabetta Patorno, M.D., Dr.P.H., Robert J. Glynn, Ph.D., Lee S. Cohen, M.D., Helen Mogun, M.S., Krista F. Huybrechts, M.S., Ph.D.

**Objetivo:** Algunos antipsicóticos atípicos están asociados a efectos secundarios metabólicos, que son factores de riesgo de diabetes gestacional. Los autores examinaron el riesgo de desarrollar diabetes gestacional asociado a la continuación del tratamiento con aripiprazol, ziprasidona, quetiapina, risperidona y olanzapina durante el embarazo, en comparación con la discontinuación de estos medicamentos antipsicóticos.

**Método:** En los análisis se incluyeron mujeres no diabéticas, en embarazo, relacionadas con un niño nacido vivo y afiliadas a *Medicaid* (2000–2010) y a las que se les habían dado una o más recetas para un medicamento antipsicótico durante los 3 meses anteriores al embarazo. De 1.543.334 embarazos, algunas madres gestantes al inicio del estudio estaban recibiendo tratamiento con aripiprazol (N=1.924), ziprasidona (N=673), quetiapina (N=4.533), risperidona (N=1.824) u olanzapina (N=1.425). Para cada medicamento antipsicótico, las mujeres con dos o más dispensaciones ("continuadoras") se compararon con las mujeres sin ninguna dispensación ("descontinuadoras") durante la primera mitad del embarazo. Se utilizó un modelo lineal generalizado y estratificación de valores de propensión para obtener los riesgos absoluto y relativo de desarrollar diabetes gestacional, con ajustes para las variables de confusión.

**Resultados:** Las mujeres que continuaron el tratamiento con antipsicóticos durante el embarazo generalmente tuvieron mayor comorbilidad y uso de antipsicóticos durante más tiempo al inicio del estudio. El riesgo sin ajustar de desarrollar diabetes gestacional entre las continuadoras en comparación con las descontinuadoras, respectivamente, fue 4,8% y 4,5% para el aripiprazol; 4,2% y 3,8% para la ziprasidona; 7,1% y 4,1% para la quetiapina; 6,4% y 4,1% para la risperidona; y 12,0% y 4,7% para la olanzapina. Los riesgos relativos ajustados fueron 0,82 (IC 95%=0,50–1,33) para el aripiprazol; 0,76 (IC 95%=0,29–2,00) para la ziprasidona; 1,28 (IC 95%=1,01–1,62) para la quetiapina; 1,09 (IC 95%=0,70–1,70) para la risperidona; y 1,61 (IC 95%=1,13–2,29) para la olanzapina.

**Conclusiones:** En comparación con las mujeres que discontinuaron el uso de un medicamento antipsicótico atípico antes del inicio del embarazo, las mujeres que continuaron el tratamiento con olanzapina o quetiapina tuvieron un riesgo más elevado de diabetes gestacional que puede explicarse por los efectos metabólicos asociados a estos dos medicamentos.

(*Am J Psychiatry* 2018; 175:564–574)
